# Supplementary material
Source: publisher figshare collection journal article supplement (https://tandf.figshare.com/ndownloader/files/16840034)
Supplement: Supplementary file 1 [file 16840034]

## Appendix

Table A1: Overview of variables used in the empirical analysis

| Variable                   | Operationalization                                                                                                                                  | Data source                                                                    |
|----------------------------|-----------------------------------------------------------------------------------------------------------------------------------------------------|--------------------------------------------------------------------------------|
| Dependent variable         |                                                                                                                                                     |                                                                                |
| Economic performance (GDP) | Log of GDP per capita in real prices                                                                                                                | Cambridge Econometrics                                                         |
| Independent variables      |                                                                                                                                                     |                                                                                |
| Innovation subsidies       | Log of public subsidies for all projects in the field of innovation and technology; aggregated on ROR level, per year and per capita in real prices | Public funding statistics (Förderkatalog)                                      |
| Innovation activity        | Log of number of EPO patents, assigned to ROR by address of the German inventor(s), aggregated on ROR level, per year and per capita                | PATSTAT                                                                        |
| Human capital              | Log of share of highly qualified employees over all employees, aggregated on ROR level, per year                                                    | IAB-BHP (Establishment History Panel of the Institute for Employment Research) |
| Entrepreneurial activity   | Log of number of newly founded companies per ROR and year                                                                                           | IAB-BHP (Establishment History Panel of the Institute for Employment Research) |

Source: own presentation.

Table A2: Descriptive statistics of the variables included in the analysis

| Variable                   |         | Mean     | Std. Dev. | Min      | Max      | Observations |      |
|----------------------------|---------|----------|-----------|----------|----------|--------------|------|
| Economic performance (GDP) | overall | 25578.46 | 6223.181  | 13403.98 | 53122.09 | N =          | 2611 |
|                            | between |          | 4934.772  | 18149.54 | 45666    | n =          | 75   |
|                            | within  |          | 3817.291  | 12497.23 | 49012.5  | T =          | 34.8 |
| Innovation subsidies       | overall | 17.29275 | 25.90762  | .00607   | 476.2163 | N =          | 2529 |
|                            | between |          | 17.26621  | 1.481157 | 82.95762 | n =          | 75   |
|                            | within  |          | 19.42233  | -51.0595 | 410.5514 | T =          | 33.7 |
| Innovation activity        | overall | 2.231784 | 1.70717   | 0.012841 | 9.838541 | N =          | 2611 |
|                            | between |          | 1.30995   | 0.332033 | 5.623759 | n =          | 75   |
|                            | within  |          | 1.101114  | -1.90001 | 6.981406 | T =          | 34.8 |
| Human capital              | overall | .0887143 | .0497915  | .0152253 | .3296743 | N =          | 2625 |
|                            | between |          | .0289132  | .0445895 | .1797807 | n =          | 75   |
|                            | within  |          | .04067    | -.016235 | .2386079 | T =          | 35   |
| Entrepreneurial activity   | overall | 721.9112 | 782.419   | 99       | 11941    | N =          | 2625 |
|                            | between |          | 618.0095  | 217.0286 | 3317.4   | n =          | 75   |
|                            | within  |          | 484.9667  | -1206.49 | 9345.511 | T =          | 35   |

Source: own calculation.

Explanation: The first row for each variable displays the “overall” statistics, across all years and regions. The second one shows “between” statistics, and takes into account only the cross-sectional dimension of the data with n=75 for all variables. The final row of each variable stands for variation across time. It shows that although there are some missing years, they are few (T is close to or equal to 35 for each variable), meaning that our panel is strongly balanced.

Note: For the ease of reading the descriptive statistics, innovation activity is rescaled as a number of patents per 10 000 inhabitants. For the same reason, the numbers in the table are presented in non-log form, whereas natural logarithms are used for calculation, as explained in the text.

Table A3. Correlation matrix for variables used in the estimations, year 1980 (beginning of the observation period)

|                          | GDP per capita | Innovation<br>subsidies | Innovation<br>activity | Human<br>capital | Entrepreneurial<br>activity |
|--------------------------|----------------|-------------------------|------------------------|------------------|-----------------------------|
| GDP per capita           | 1              |                         |                        |                  |                             |
| Innovation subsidies     | 0.576***       | 1                       |                        |                  |                             |
| Innovation activity      | 0.478***       | 0.281*                  | 1                      |                  |                             |
| Human capital            | 0.711***       | 0.612***                | 0.425***               | 1                |                             |
| Entrepreneurial activity | 0.618***       | 0.435***                | 0.438***               | 0.587***         | 1                           |

\*  $p < 0.05$ , \*\*  $p < 0.01$ , \*\*\*  $p < 0.001$

Source: own calculation.

Table A4. Correlation matrix for variables used in the estimations, year 2014 (end of the observation period)

|                          | GDP per capita | Innovation subsidies | Innovation activity | Human capital | Entrepreneurial activity |
|--------------------------|----------------|----------------------|---------------------|---------------|--------------------------|
| GDP per capita           | 1              |                      |                     |               |                          |
| Innovation subsidies     | 0.385***       | 1                    |                     |               |                          |
| Innovation activity      | 0.527***       | 0.263*               | 1                   |               |                          |
| Human capital            | 0.579***       | 0.687***             | 0.384***            | 1             |                          |
| Entrepreneurial activity | 0.460***       | 0.436***             | 0.287*              | 0.728***      | 1                        |

\*  $p < 0.05$ , \*\*  $p < 0.01$ , \*\*\*  $p < 0.001$

Source: own calculation.

Table A5: Estimation results of different panel cointegration models for the West German planning regions (1980-2014). GDP as a dependant variable.

|                             | PMG                   | MG                    | DFE                   |
|-----------------------------|-----------------------|-----------------------|-----------------------|
| Innovation subsidies        | 0.006**<br>(2.60)     | 0.008*<br>(1.95)      | 0.007<br>(1.30)       |
| Innovation activity         | 0.032***<br>(4.47)    | 0.037**<br>(2.83)     | 0.044**<br>(3.00)     |
| Human capital               | 0.240***<br>(29.32)   | 0.258***<br>(18.15)   | 0.221***<br>(11.78)   |
| Entrepreneurial activity    | -0.001<br>(-0.14)     | -0.015<br>(-1.52)     | 0.014<br>(0.78)       |
| Speed of adjustment         | -0.295***<br>(-14.64) | -0.582***<br>(-18.27) | -0.206***<br>(-16.91) |
| SR Innovation subsidies     | 0.000<br>(0.09)       | -0.001<br>(-0.89)     | 0.001<br>(0.78)       |
| SR Innovation activity      | 0.020***<br>(4.35)    | 0.010**<br>(1.96)     | 0.011**<br>(2.89)     |
| SR Human capital            | 0.009<br>(0.43)       | -0.023<br>(-0.95)     | 0.026<br>(1.10)       |
| SR Entrepreneurial activity | -0.007**<br>(-2.79)   | -0.001<br>(-0.48)     | -0.007**<br>(-2.48)   |

|                      |                     |                     |                     |
|----------------------|---------------------|---------------------|---------------------|
| Constant term        | 3.257***<br>(14.62) | 6.599***<br>(16.98) | 2.275***<br>(15.86) |
| No. of obs           | 2400                | 2400                |                     |
| BIC                  | -10130              | -10794              | .                   |
| Log pseudolikelihood | 5104                | 5436                |                     |
| Hausman test         | 0.2741              |                     |                     |

*z* statistics in parentheses

\*  $p < 0.10$ , \*\*  $p < 0.05$ , \*\*\*  $p < 0.001$

Table A6: Estimation results of the panel cointegration model for West German planning regions (1984-2014). GDP as a dependant variable. Top performers.

|                                    | PMG                   | MG                    | DFE                   |
|------------------------------------|-----------------------|-----------------------|-----------------------|
| Innovation subsidies               | 0.009**<br>(2.93)     | 0.009*<br>(1.86)      | 0.011*<br>(1.68)      |
| Innovation activity                | 0.042***<br>(5.48)    | 0.039**<br>(2.46)     | 0.049**<br>(2.73)     |
| Human capital                      | 0.243***<br>(29.57)   | 0.264***<br>(16.41)   | 0.236***<br>(10.75)   |
| Entrepreneurial activity           | -0.001<br>(-0.08)     | -0.012<br>(-1.24)     | 0.007<br>(0.34)       |
| Speed of adjustment                | -0.308***<br>(-12.50) | -0.587***<br>(-18.74) | -0.201***<br>(-14.51) |
| SR Innovation subsidies per capita | -0.001<br>(-0.48)     | -0.002<br>(-0.92)     | 0.000<br>(0.15)       |
| SR Innovation activity             | 0.026***<br>(4.55)    | 0.017**<br>(2.78)     | 0.021***<br>(4.21)    |
| SR Human capital                   | 0.021<br>(0.89)       | -0.025<br>(-0.92)     | 0.052*<br>(1.81)      |
| SR Entrepreneurial activity        | -0.008***<br>(-3.53)  | -0.004<br>(-1.44)     | -0.007**<br>(-2.13)   |

|                      |                     |                     |                     |
|----------------------|---------------------|---------------------|---------------------|
| Constant term        | 3.427***<br>(12.47) | 6.655***<br>(17.99) | 2.239***<br>(13.68) |
| No. of obs           | 1838                | 1838                |                     |
| BIC                  | -7702               | -8171               | .                   |
| Log pseudolikelihood | 3889                | 4123                |                     |
| Hausman test         | 0.0157              |                     |                     |

z statistics in parentheses

\* p<0.10, \*\* p<0.05, \*\*\* p<0.001

Source: own calculation.



Figure A1: Time series for variables used in the analysis (standardized) for selected regions

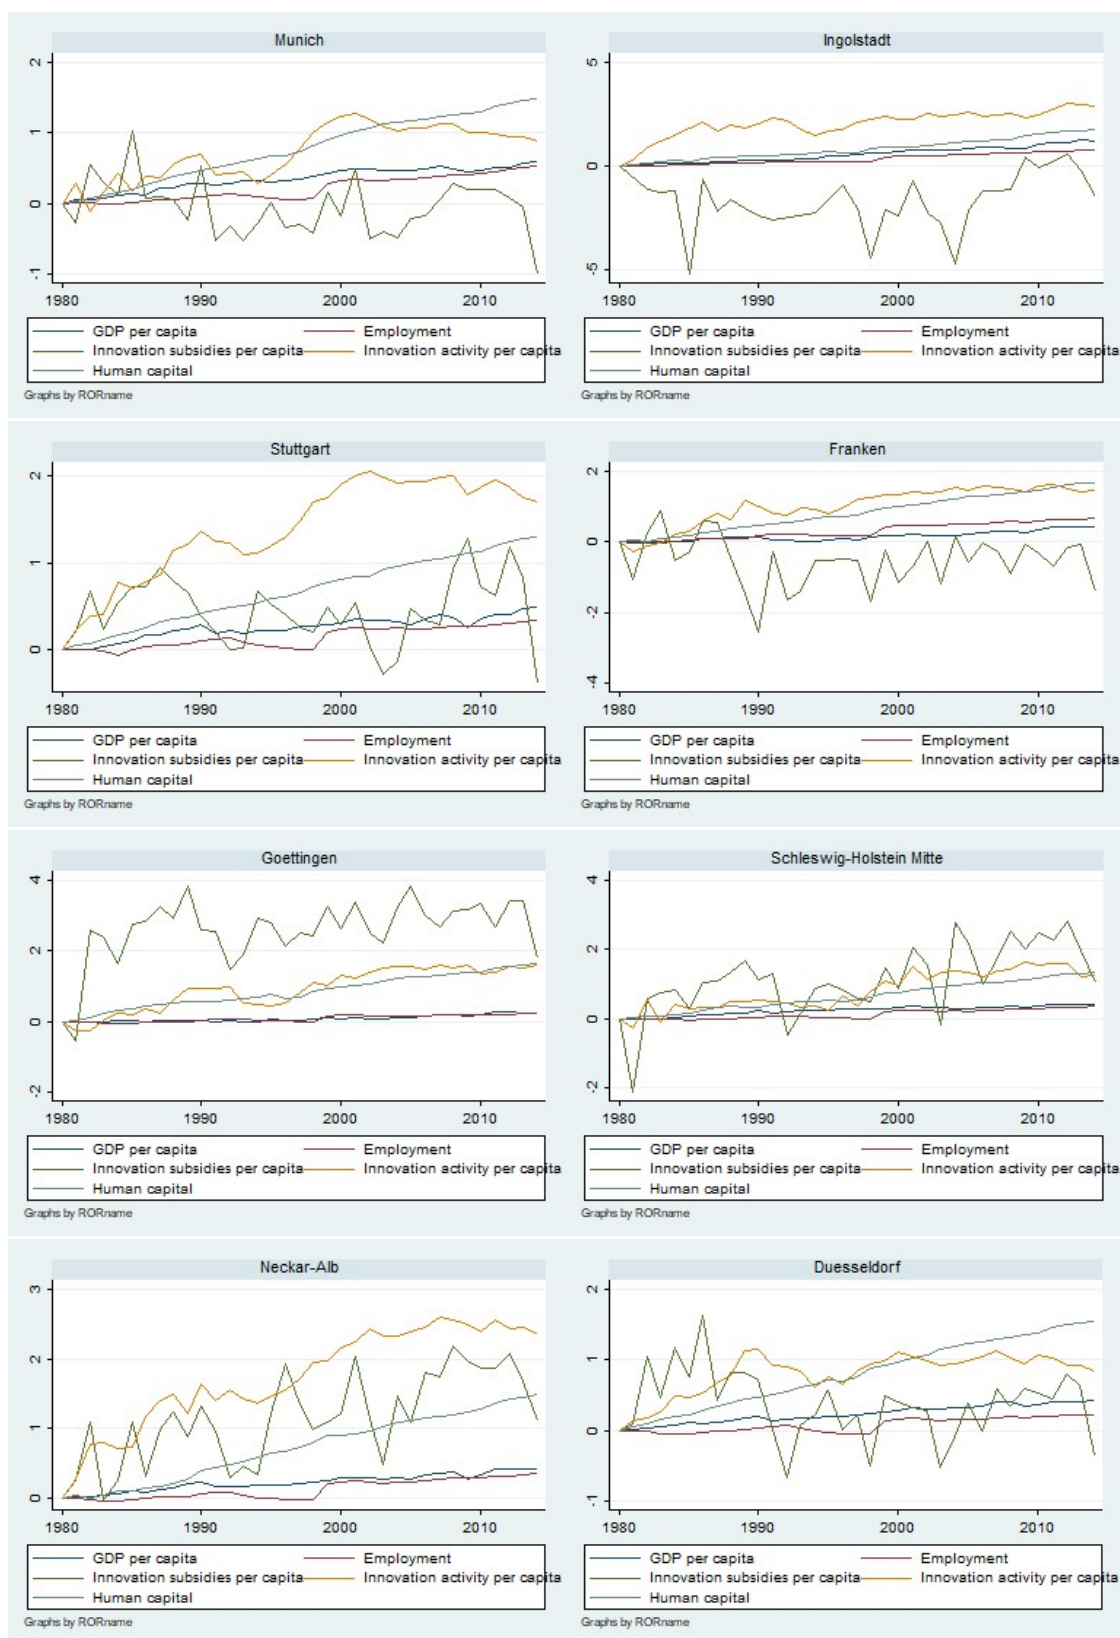

Data source: Cambridge Econometrics, Förderkatalog, PATSTAT. Own calculation.

Figure A2. Real GDP per capita per planning region (ROR). Comparison between 1980 and 2014.

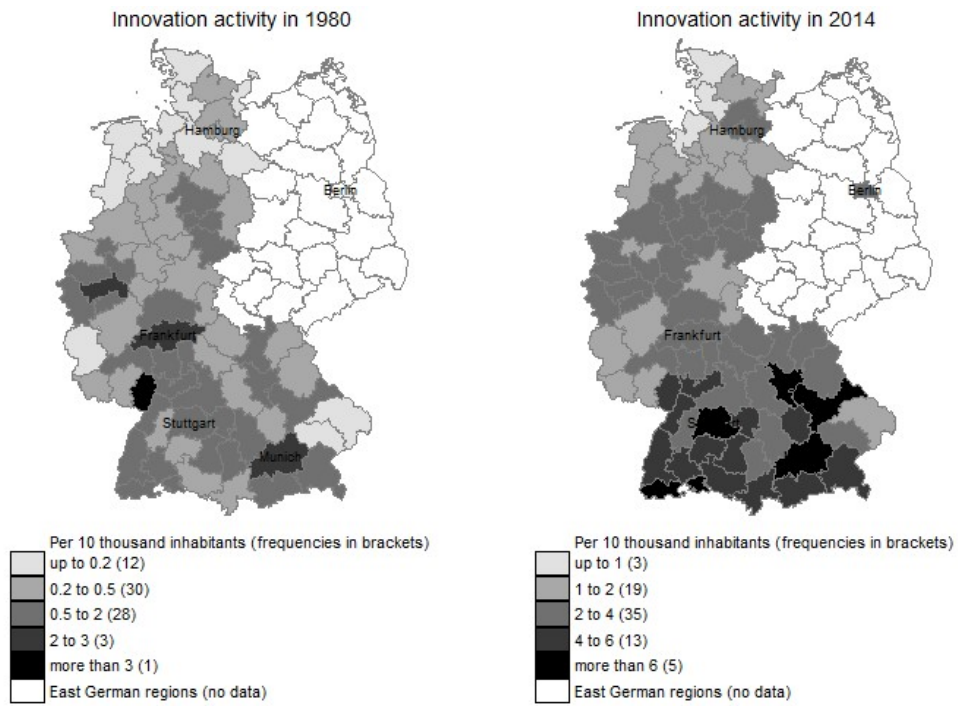

Source: Cambridge econometrics. Own calculations.

Figure A3. Number of patents with at least one German applicant per capita per planning region (ROR). Comparison between 1980 and 2014.

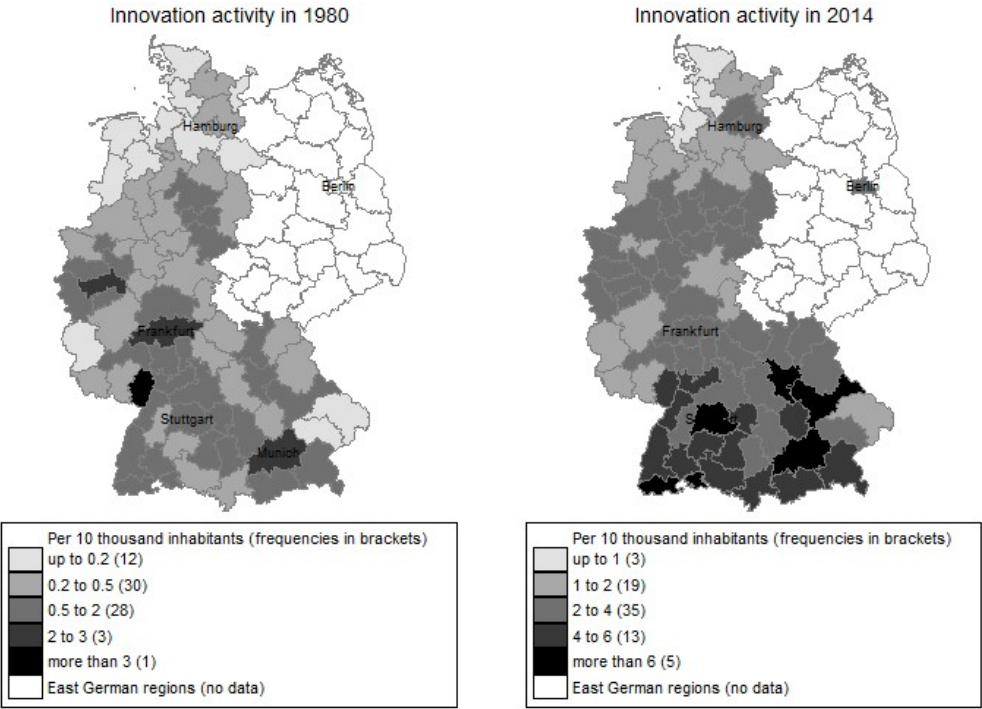

Source: PATSTAT, Cambridge econometrics. Own calculations.

Figure A4. Share of public innovation subsidies per capita per planning region (ROR). Comparison between 1980 and 2014.

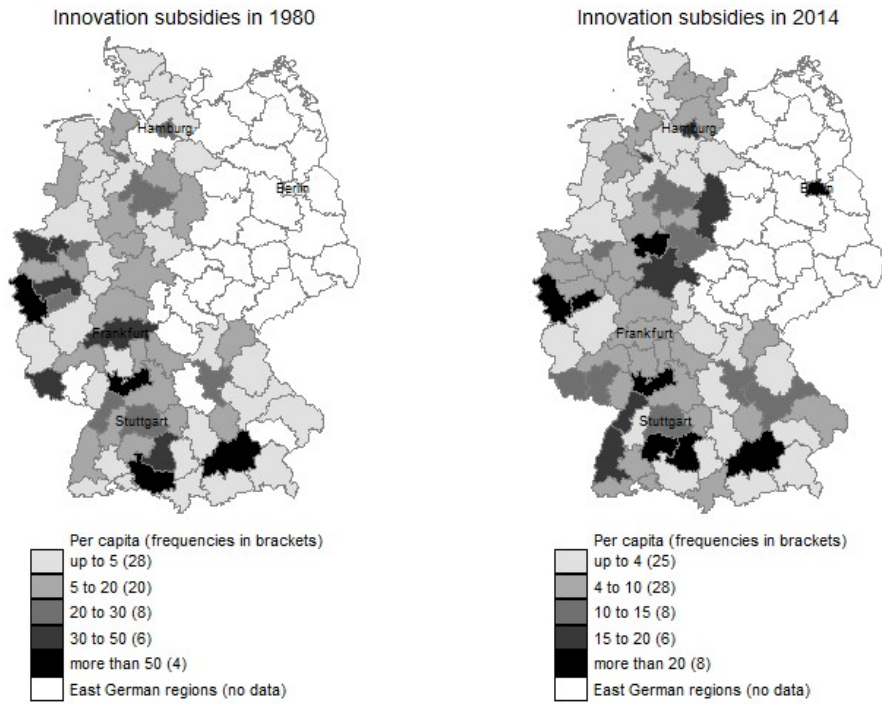

Source: Förderkatalog, Cambridge econometrics. Own calculations.
